# Supplementary material
Source: PubMed Central journal article supplement (PMC549399)
Supplement: nar_33_3_880__1.pdf [file nar_33_3_880__1.pdf]

**Supplementary Table 1: Agreement of our unsupervised and supervised predictions with experimentally identified operon and not-operon pairs in *E. coli* and *B. subtilis*.** AOC is the area under the operating curve (e.g., Figure 3A), or the probability that an operon pair will have a better score than a not-operon pair if both pairs are chosen at random. Default sensitivity (fraction of known operon pairs which are correctly predicted) and specificity (fraction of known not-operon pairs which are correctly predicted) are computed with a threshold of predicted  $p > 0.5$ , and maximum accuracy is the maximum over all possible thresholds of the average of sensitivity and specificity. The unsupervised microarray-based predictions, which are shown only in this table, use a logistic regression of the microarray data (rank of Pearson  $r$ , total intensity, and total absolute change of log-levels for the pair, with pairwise interactions) versus the usual unsupervised predictions (thresholded at 0.5).

For comparison, we show results from our supervised predictions, from Salgado *et al.* 2000 for *E. coli* (using distance and Monica Riley’s functional classification, or just distance), from Sabatti *et al.* 2002 for *E. coli* (using correlation in microarray data and/or distance as features, on a somewhat different training set), from Bockhorst *et al.* 2003b for *E. coli* (distance-only or distance plus microarrays and further sequence-based features), from Moreno-Hagelsieb and Collado-Vides 2002 for *B. subtilis* (using a distance model trained in *E. coli*), and from De Hoon *et al.* 2004 for *B. subtilis* (using distance and/or microarray correlation, and a much larger unpublished training set). We do not show the results of Bockhorst *et al.* 2003a because they report accuracy for predicting transcripts, not individual pairs of genes.

| Measure                               | AOC   | Max. Acc. | Def. Sens. | Def. Spec. |
|---------------------------------------|-------|-----------|------------|------------|
| <b>E. coli</b>                        |       |           |            |            |
| Unsupervised (Sequence-only)          | 0.920 | 0.852     | 0.883      | 0.799      |
| Distance-only                         | 0.886 | 0.829     | 0.794      | 0.857      |
| Unsupervised with microarrays         | 0.925 | 0.863     | 0.890      | 0.817      |
| Microarray-only                       | 0.820 | 0.750     | 0.834      | 0.660      |
| Supervised (Sequence-only)            | 0.919 | 0.859     | 0.865      | 0.850      |
| Salgado <i>et al.</i> 2000            | –     | 0.87      | –          | –          |
| Distance-only                         | –     | 0.82      | –          | –          |
| Sabatti <i>et al.</i> 2002            | –     | 0.88      | 0.88       | 0.88       |
| Distance-only                         | –     | 0.83      | 0.84       | 0.82       |
| Microarray-only                       | –     | 0.76      | 0.82       | 0.70       |
| Bockhorst <i>et al.</i> 2003b         | 0.929 | –         | 0.78       | 0.90       |
| Distance-only                         | 0.915 | –         | –          | –          |
| <b>B. subtilis</b>                    |       |           |            |            |
| Unsupervised (Sequence-only)          | 0.888 | 0.815     | 0.909      | 0.710      |
| Distance-only                         | 0.882 | 0.863     | 0.825      | 0.863      |
| Unsupervised with microarrays         | 0.885 | 0.844     | 0.922      | 0.727      |
| Microarray-only                       | 0.748 | 0.692     | 0.804      | 0.545      |
| Supervised (Sequence-only)            | 0.907 | 0.868     | 0.877      | 0.847      |
| Moreno-Hagelsieb & Collado-Vides 2002 | –     | 0.82      | –          | –          |
| de Hoon <i>et al.</i> 2004            | –     | 0.884     | 0.888      | 0.879      |
| Distance-only                         | –     | 0.856     | 0.821      | 0.890      |
| Microarray-only                       | –     | 0.796     | 0.801      | 0.791      |

**Supplementary Table 2: Statistical tests of differences between *E. coli*'s distance model and those of *Halobacterium NRC-1* and *Helicobacter pylori*.** To confirm differences in distance models, we tested same-strand pairs separated by 20-49 base pairs (*E. coli* vs. *Halobacterium*) or by 50-99 base pairs (*E. coli* vs. *H. pylori*). We compared how often these pairs were conserved within 5 kb in a distant genome, relative to other pairs in the same genome. We show the 90% confidence intervals of the odds ratios from the Fisher exact test. In both cases the odds ratio in *E. coli* is higher, indicating significantly greater conservation at these separations ( $p < 0.05$ ).

| Genome               | Range (bp) | Conserved within 5 kb |                   | Odds Ratio |
|----------------------|------------|-----------------------|-------------------|------------|
|                      |            | In-range pairs        | Other pairs       |            |
| <i>Halobacterium</i> | 20–49      | 12/194 (6.2%)         | 173/1017 (17.0%)  | 0.18–0.55  |
| <i>E. coli</i>       | 20–49      | 127/324 (39.4%)       | 956/2681 (35.7%)  | 0.95–1.4   |
| <i>H. pylori</i>     | 50–99      | 15/143 (10.5%)        | 314/1083 (29.0%)  | 0.17–0.46  |
| <i>E. coli</i>       | 50–99      | 117/426 (27.5%)       | 966/2,579 (37.5%) | 0.52–0.77  |

**Supplementary Table 3: Comparison of “strand-wise” and “strand-naive” models for estimating P(Operon—Same).** The strand-wise estimate leads to significantly more accurate unsupervised predictions in *B. subtilis*. The poor agreement between both estimates and the *E. coli* distance model-based method of Moreno-Hagelsieb and Collado-Vides (2002) probably reflects the biologically meaningful variation in the distance distributions of different genomes (Rogozin *et al.* 2002).

| Issue                                                                 | Measure                                                                                        | Strand-wise | Strand-naive | p                                                                                                             |
|-----------------------------------------------------------------------|------------------------------------------------------------------------------------------------|-------------|--------------|---------------------------------------------------------------------------------------------------------------|
| # Operons in <i>B. subtilis</i>                                       | % same-strand pairs that are within operons                                                    | 51.7%       | 41.3%        | –                                                                                                             |
| Accuracy on known operons in <i>B. subtilis</i>                       | Area under the operating curve                                                                 | 0.888       | 0.864        | $<10^{-5}$ , test of DeLong <i>et al.</i> 1988                                                                |
| Agreement with microarray data for <i>B. subtilis</i>                 | Spearman correlation of $P(\text{Operon}   \text{AllFeatures})$ with microarray similarity $r$ | 0.461       | 0.433        | $<10^{-10}$ , two-sided $t$ -test of correlation between $\text{rank}(r)$ and differences in $\text{rank}(p)$ |
| Agreement of estimated # operons with <i>E. coli</i> -based estimates | Spearman correlation, 124 genomes                                                              | 0.363       | 0.223        | 0.04, correlation test of ranked differences                                                                  |
